# Supplementary material
Source: publisher figshare collection journal article supplement (https://frontiersin.figshare.com/ndownloader/files/24028106)
Supplement: Supplementary file [file 24028106]

## *Supplementary Material*

### **1.1 Supplementary Figures**

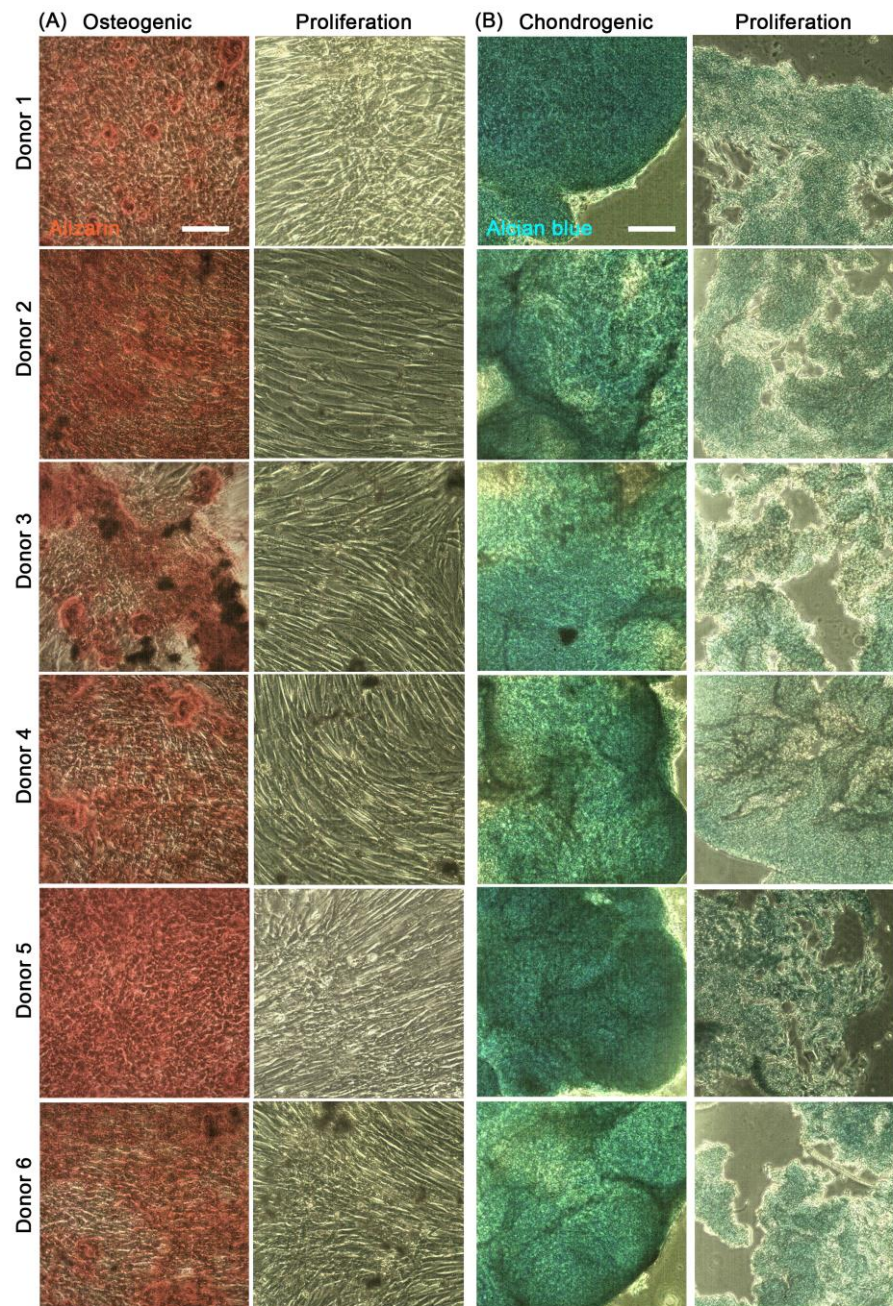

**Supplementary Figure 1.** (A) Light microscopy of cAdMSC from six donors incubated for 14 days in osteogenic or proliferation medium and stained for Alizarin red (scale bar 100  $\mu$ m). (B) Light microscopy images of cAdMSC from six donors incubated for 21 days in chondrogenic differentiation or proliferation medium and stained for alcian blue (blue) (scale bar 100  $\mu$ m).

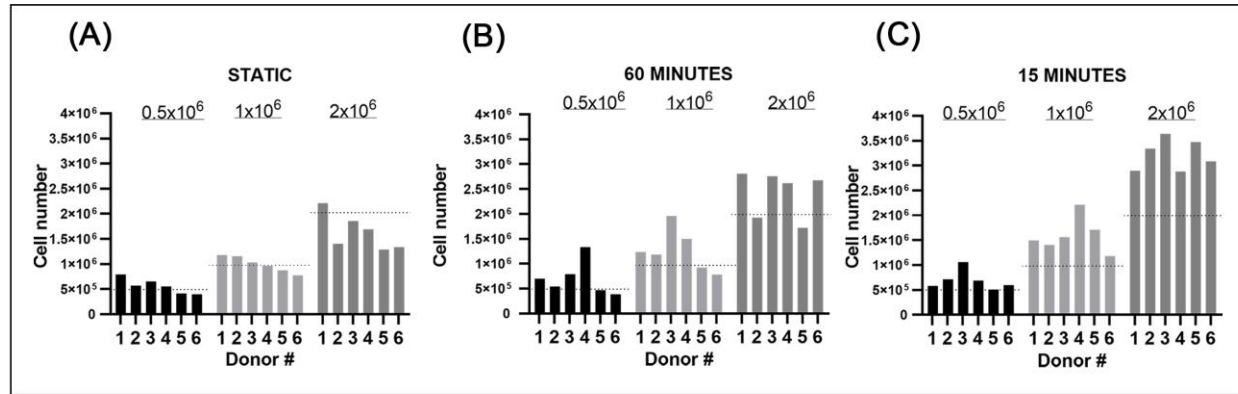

**Supplementary Figure 2.** Quantification of cAdMSC attachment to the surface of PLGA TIPS microcarriers under different experimental conditions. Cells from six donors were cultured with 50 mg PLGA TIPS microcarriers for 18 hours with either (A) static, (B) intermittent plate shaking for 30 seconds every hour, or (C) intermittent plate shaking for 30 seconds every 15 minutes.
